# Supplementary material for: Trends and Projections in Breast Cancer Mortality among four Asian countries (1990–2017): Evidence from five Stochastic Mortality Models
Source: Springer Nature journal article supplement (doi:10.1038/s41598-020-62393-1), 2020-03-25
Supplement: MOESM1 [file 41598_2020_62393_MOESM1_ESM.pdf]

**Trends and Projections in Breast Cancer Mortality among four Asian countries (1990-2017):  
Evidence from five Stochastic Mortality Models**

Sumaira Mubarik, Fang Wang, Muhammad Fawad, Yafeng Wang, Ishfaq Ahmad and Chuanhua Yu\*

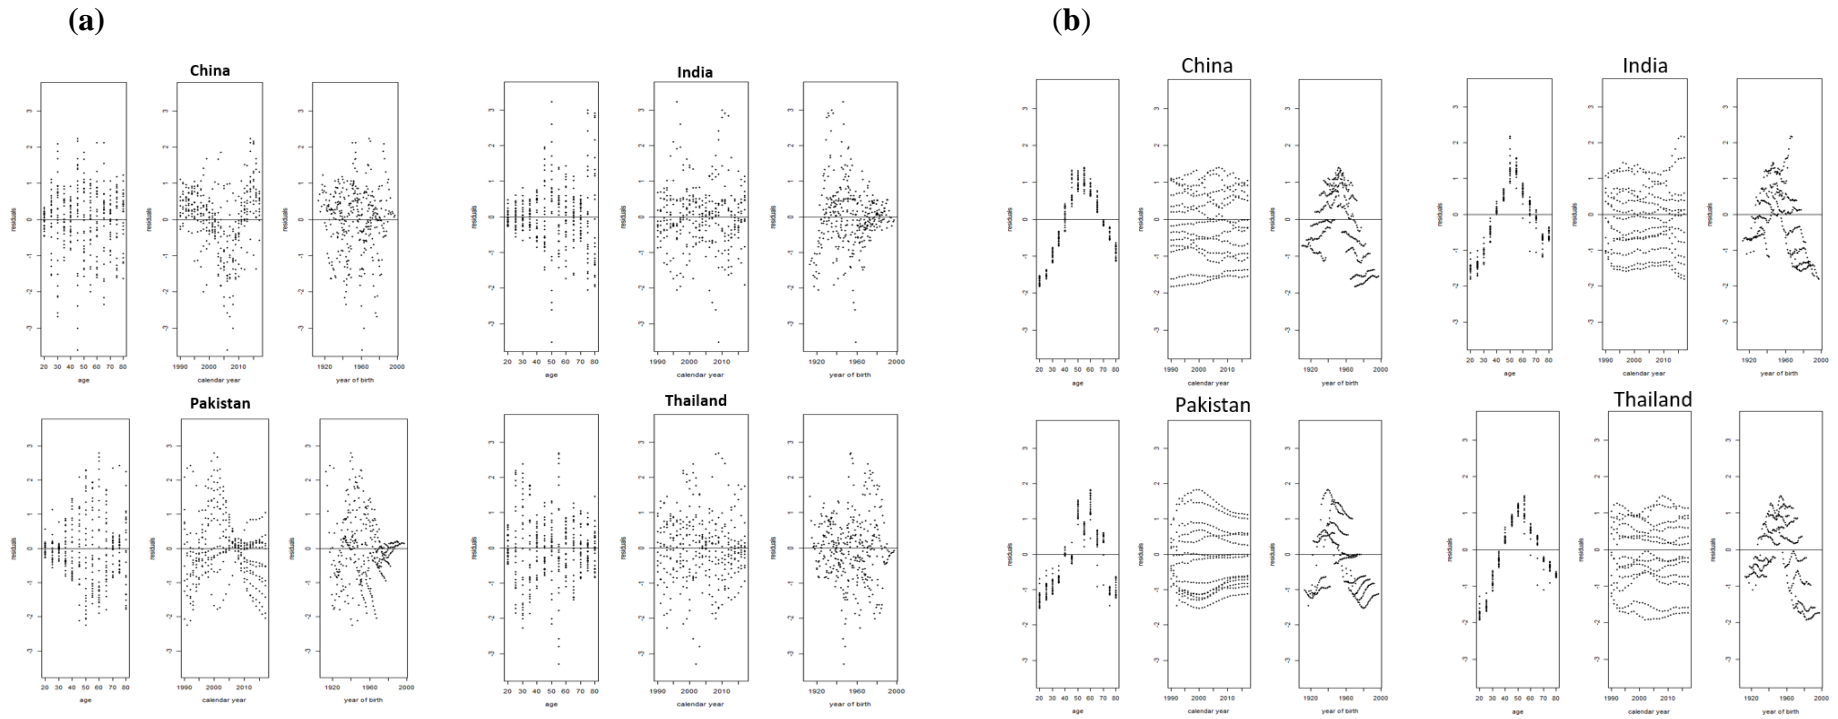

**Figure S1.** Plot of (a) LCM residuals against age, calendar year, year of birth, and (b) CBD residuals against age, calendar year and year of birth, for four Asian countries

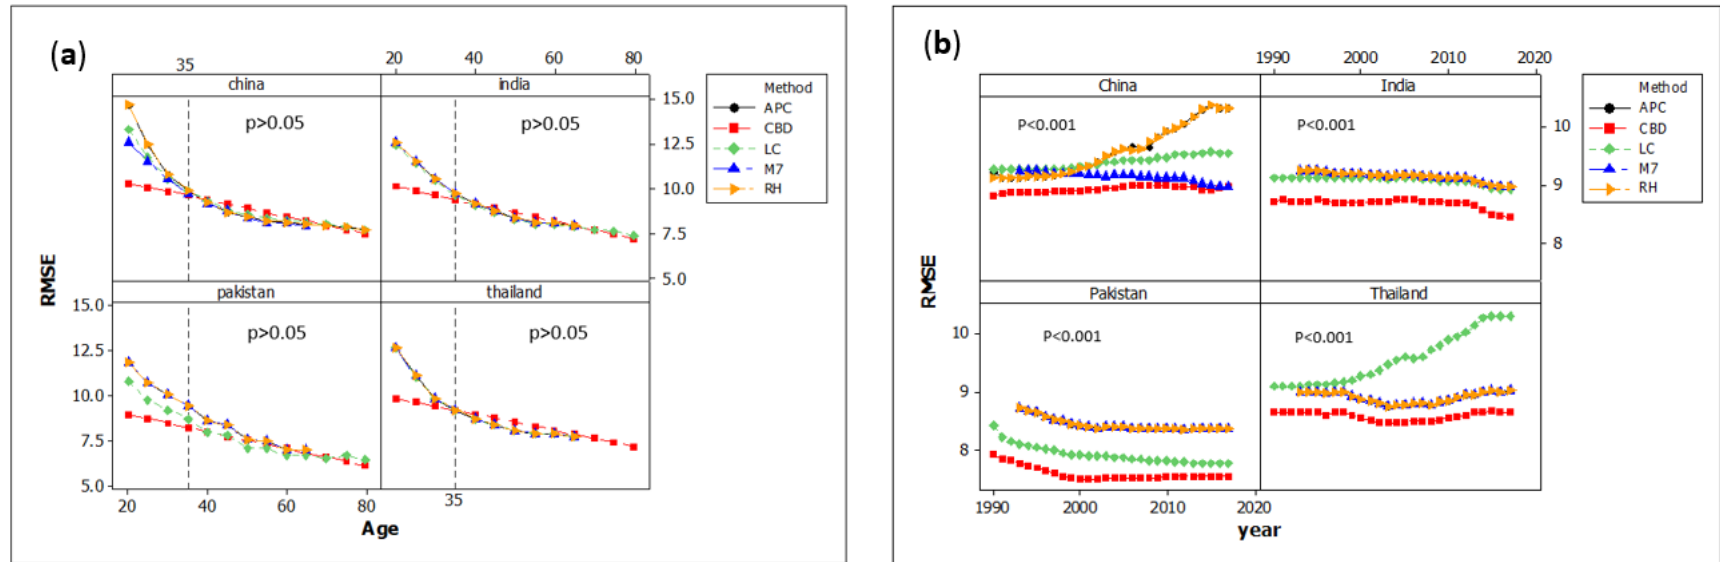

**Figure S2.** Plot of RMSE against (a) age for the overall population of 1990-2017 and (b) year for the overall population of 20-84 year of age, separately for each Asian country. Model were compared, and p-value obtained using F-test (ANOVA)
